# Supplementary material for: Global Profiling of Rice and Poplar Transcriptomes Highlights Key Conserved Circadian-Controlled Pathways and cis-Regulatory Modules
Source: PubMed Central journal article supplement (PMC3111414; doi:10.1371/journal.pone.0016907), 2011-06-09
Supplement: pone.0016907.s009.pdf [file pone.0016907.s009.pdf]

**Table S2.** Summary of rice (spp. *Japonica*) GO category enrichment under photocycles (LDHH).

| GO-ID | GO category                                 | P-value  | Correlation P-value | Cluster frequency | Overall frequency |
|-------|---------------------------------------------|----------|---------------------|-------------------|-------------------|
| 166   | nucleotide binding                          | 1.17E-29 | 1.12E-27            | 709/3352 21.1%    | 4284/29753 14.3%  |
| 6519  | amino acid and derivative metabolic process | 4.20E-26 | 2.02E-24            | 140/3352 4.1%     | 490/29753 1.6%    |
| 5737  | cytoplasm                                   | 3.87E-25 | 1.24E-23            | 501/3352 14.9%    | 2881/29753 9.6%   |
| 5623  | cell                                        | 6.37E-22 | 1.53E-20            | 1446/3352 43.1%   | 10591/29753 35.5% |
| 5575  | cellular component                          | 1.61E-18 | 3.08E-17            | 1472/3352 43.9%   | 11008/29753 36.9% |
| 5478  | transporter activity                        | 6.76E-15 | 1.08E-13            | 279/3352 8.3%     | 1581/29753 5.3%   |
| 6810  | transport                                   | 2.51E-14 | 3.44E-13            | 403/3352 12.0%    | 2510/29753 8.4%   |
| 5622  | intracellular                               | 6.85E-12 | 8.21E-11            | 1000/3352 29.8%   | 7431/29753 24.9%  |
| 16301 | kinase activity                             | 2.82E-11 | 3.01E-10            | 327/3352 9.7%     | 2055/29753 6.9%   |
| 16020 | membrane                                    | 2.25E-10 | 2.16E-09            | 580/3352 17.3%    | 4076/29753 13.6%  |
| 19725 | cellular homeostasis                        | 1.32E-09 | 1.15E-08            | 45/3352 1.3%      | 155/29753 0.5%    |
| 6464  | protein modification process                | 1.76E-09 | 1.41E-08            | 315/3352 9.3%     | 2038/29753 6.8%   |
| 19748 | secondary metabolic process                 | 4.57E-07 | 3.37E-06            | 38/3352 1.1%      | 145/29753 0.4%    |
| 9056  | catabolic process                           | 2.02E-06 | 1.38E-05            | 122/3352 3.6%     | 716/29753 2.4%    |
| 6416  | translation                                 | 2.48E-06 | 1.54E-05            | 151/3352 4.5%     | 931/29753 3.1%    |
| 5975  | carbohydrate metabolic process              | 2.57E-06 | 1.54E-05            | 152/3352 4.5%     | 939/29753 3.1%    |
| 5739  | mitochondrion                               | 8.24E-06 | 4.65E-05            | 72/3352 2.1%      | 382/29753 1.2%    |
| 8150  | biological process                          | 9.20E-05 | 4.90E-04            | 2566/3352 76.5%   | 21984/29753 73.8% |
| 9536  | plastid                                     | 2.63E-04 | 1.33E-03            | 93/3352 2.7%      | 578/29753 1.9%    |
| 5730  | nucleolus                                   | 3.82E-04 | 1.84E-03            | 7/3352 0.2%       | 14/29753 0.0%     |
| 8135  | translation factor activity                 | 9.44E-04 | 4.31E-03            | 31/3352 0.9%      | 154/29753 0.5%    |
| 45182 | translation regulator activity              | 1.05E-03 | 4.60E-03            | 31/3352 0.9%      | 155/29753 0.5%    |
| 6629  | lipid metabolic process                     | 1.27E-03 | 5.30E-03            | 105/3352 3.1%     | 698/29753 2.3%    |
| 19818 | peroxisome                                  | 3.59E-03 | 1.43E-02            | 8/3352 0.2%       | 24/29753 0.0%     |
| 5783  | endoplasmic reticulum                       | 5.58E-03 | 2.14E-02            | 32/3352 0.9%      | 179/29753 0.6%    |
| 15979 | photosynthesis                              | 6.78E-03 | 2.50E-02            | 37/3352 1.1%      | 217/29753 0.7%    |
| 5840  | ribosome                                    | 1.25E-02 | 4.45E-02            | 106/3352 3.1%     | 761/29753 2.5%    |
